# Supplementary material for: Salinity Stress-Mediated Suppression of Expression of Salt Overly Sensitive Signaling Pathway Genes Suggests Negative Regulation by AtbZIP62 Transcription Factor in Arabidopsis thaliana
Source: MDPI journal article supplement (doi:10.3390/ijms21051726), 2020-03-03
Supplement: s1 [file s1]

# Salinity Stress-Mediated Suppression of Expression of Salt Overly Sensitive Signaling Pathway Genes Suggests Negative Regulation by *AtbZIP62* Transcription Factor in *Arabidopsis thaliana*

Nkulu Kabange Rolly <sup>1,2</sup>, Qari Muhammad Imran <sup>1</sup>, In-Jung Lee <sup>3</sup> and Byung-Wook Yun <sup>1,\*</sup>

<sup>1</sup> Laboratory of Plant Functional Genomics, School of Applied Biosciences, Kyungpook National University, 702-701 Daegu, Republic of Korea; rolly.kabange@gmail.com (N.K.R.);

mimranbot@gmail.com (Q.M.I.); bwyun@knu.ac.kr (B.W.Y.)

<sup>2</sup> National Laboratory of Seed Testing, National Seed Service, SENASEM, Ministry of Agriculture, Kinshasa, 904KIN1, DR Congo

<sup>3</sup> Laboratory of Crop Physiology, School of Applied Biosciences, Kyungpook National University, Daegu, 41566, Republic of Korea; ijlee@knu.ac.kr

\* Correspondence: bwyun@knu.ac.kr; Tel.: +82539505712

Received: 07 February 2020; Accepted: 01 March 2020; Published: date

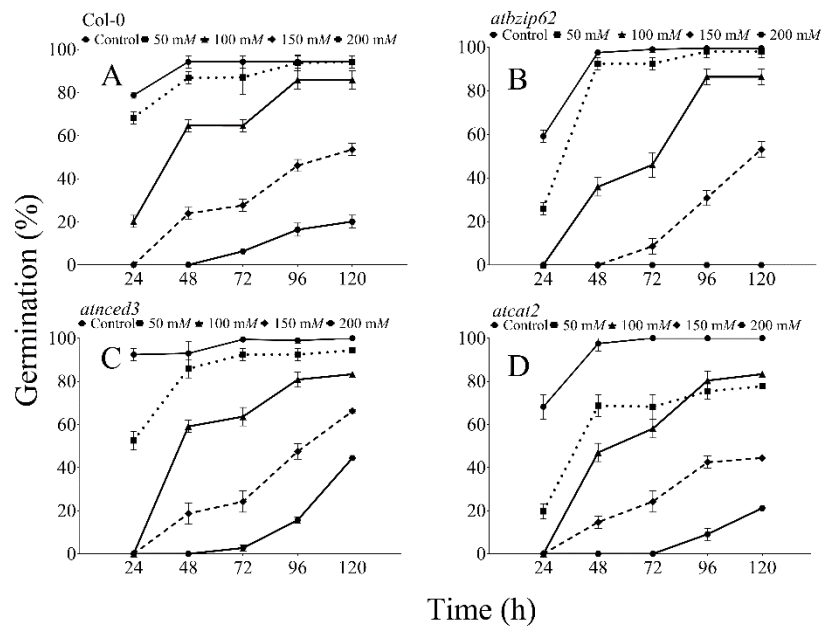

**Figure S1** Arabidopsis genotypes evaluated for their germination ability on NaCl modified media  
**A** Germination of Col-0 wild type on different salt concentration overtime. **B** *atbzip62*, **C** *atnacd3*, and **D** *atcat2* under the same conditions. Data are mean values of triplicate recorded on daily basis from 24h to 120 h after sowing.

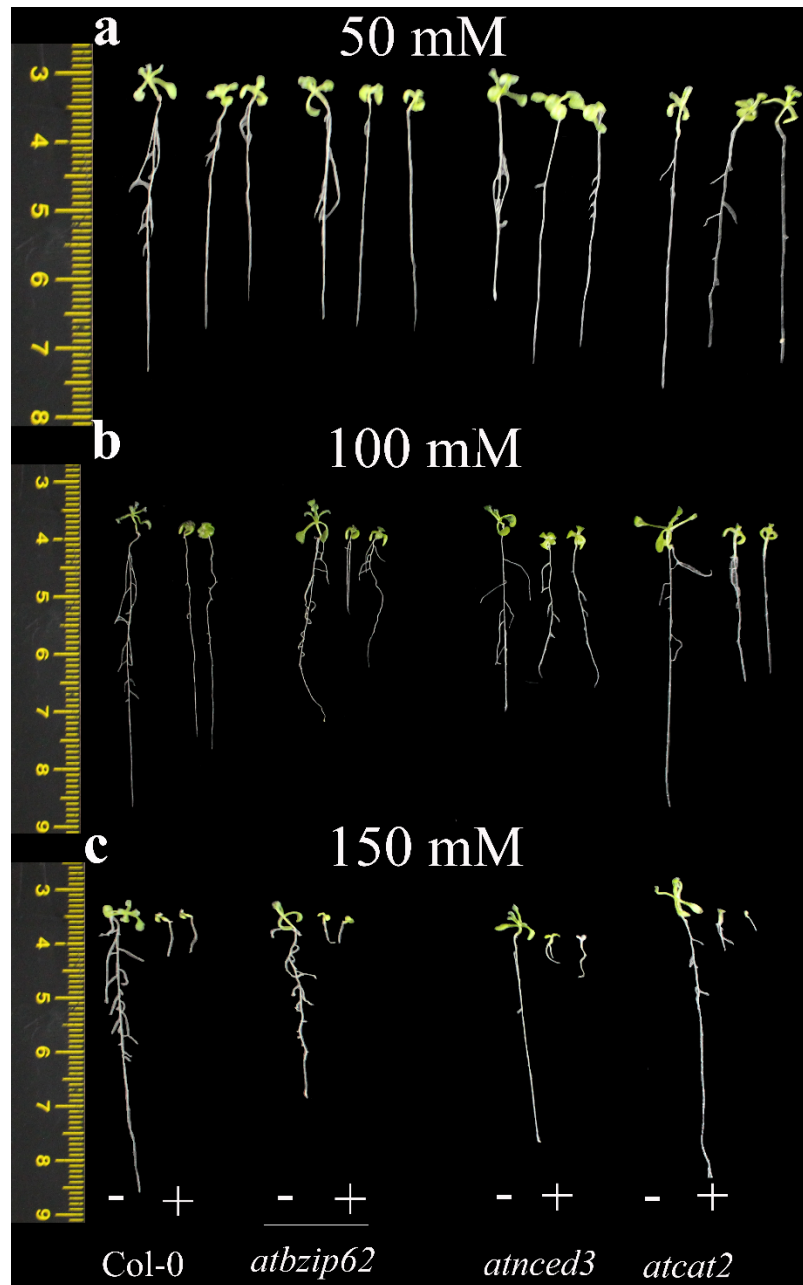

**Figure S2** Phenotype of Arabidopsis Col-0 and knockout lines on gradient NaCl concentrations on MS media

The above Figure S2 shows the phenotype of Col-0 wild type, *atbzip62*, *atnecd3*, and *atcat2* loss of function mutants in response to salt stress induced by gradient concentrations. **a** 50 mM, **b** 100 mM, and **c** 150 mM. Pictures were taken 10 days after sowing on MS media. Minus (-) sign represents control, and positive (+) sign indicates salt treatment.

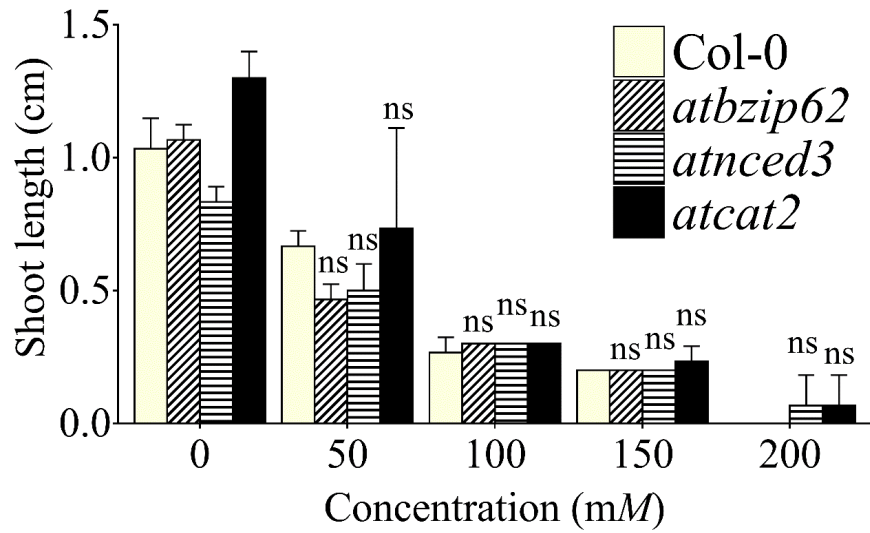

**Figure S3** Salt concentration-dependent inhibition of *Arabidopsis* shoot growth

Figure S3 shows the assessment shoot growth of *Arabidopsis* genotypes (Col-0: wild type, *atbzip62*, *atnced3* and *atcat2*) toward salinity stress on half-strength MS medium gradients concentrations (50, 100, 150 and 200 mM NaCl). Data points are the mean of triplicate while error bars indicate  $\pm$ SD recorded two weeks after sowing. Data are compared with Col-0 wild type. Asterisks on top of bars are statistical significance level with 95% confidence level. \* $P < 0.05$ , \*\* $P < 0.01$ , \*\*\* $P < 0.001$ , and *ns* non-significant. Error bars are means  $\pm$  SD.

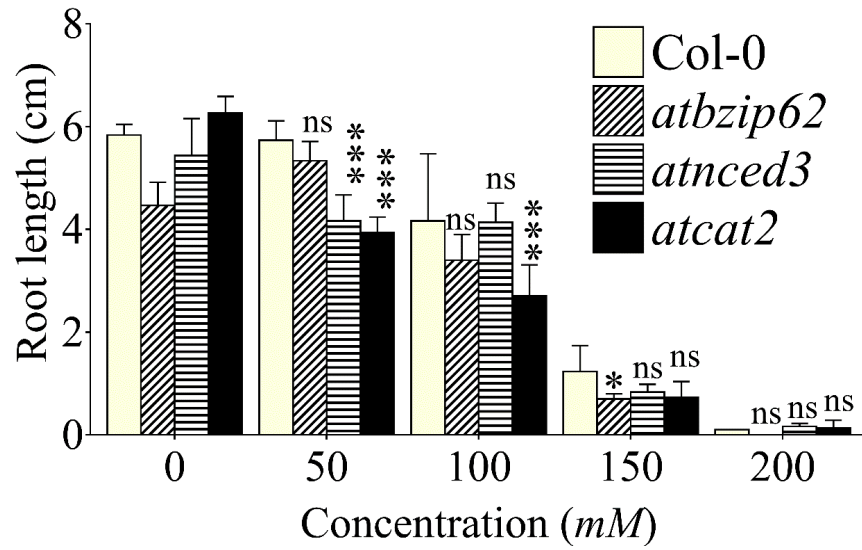

**Figure S4** Inhibition of root growth by increasing NaCl-induced salt stress

Figure S4 shows the assessment root growth of *Arabidopsis* genotypes (Col-0: wild type, *atbzip62*, *atnced3* and *atcat2*) toward salinity stress on MS medium gradients concentrations (50, 100, 150 and 200 mM NaCl). The data points are the mean values of triplicate while error bars indicate  $\pm$ SD recorded two weeks after sowing. Data are compared with Col-0 wild type. Asterisks on top of bars are statistical significance level with 95% confidence level. \* $P < 0.05$ , \*\* $P < 0.01$ , \*\*\* $P < 0.001$ , and *ns* non-significant. Error bars are means  $\pm$  SD.

**Table S1** Genes for qPCR used in the study

| Gene Name                               | Locus     | 5'-Forwad primer -3'  | 5'-Reverse primer -3' | Gene Name                                        |
|-----------------------------------------|-----------|-----------------------|-----------------------|--------------------------------------------------|
| Drought responsive genes in Arabidopsis |           |                       |                       |                                                  |
| <i>AtbZIP62</i>                         | AT1G19490 | CATCGAGTTGTTGCTCGTCG  | AAATCCGCCAATGCTTCTGC  | Basic-leucine zipper transcription factor 62     |
| <i>AtbZIP18</i>                         | AT2G40620 | GACCTCGACACAGGCATAGC  | AGCTCAGCGAGCTTATCAGG  | Basic-leucine zipper transcription factor 18     |
| <i>AtbZIP69</i>                         | AT1G06070 | GCCATCAGAACCGACTTGGA  | CGATTGGCTGTGTTGGTGTC  | Basic-leucine zipper transcription factor 69     |
| <i>AtPYD1</i>                           | AT3G17810 | AGTGAGGATCGCTCGCTTTC  | TCATCACACCGGTGCATACC  | <i>PYRIMIDINE 1</i>                              |
| Salt Overly Sensitive pathway genes     |           |                       |                       |                                                  |
| <i>AtSOS1</i>                           | AT2G01980 | TTACCAGCCCCCAAGAAACG  | TCAACTGTAGGCCAGTCAGC  | Arabidopsis Salt Overly Sensitive pathway gene 1 |
| <i>AtSOS2</i>                           | AT5G35410 | TTCAAGACAAGGCTCGAGGG  | CCATGAAAAGCGATGGTGCC  | Arabidopsis Salt Overly Sensitive pathway gene 2 |
| <i>AtSOS3</i>                           | AT1G19490 | GCAATGGTGTTTCCTTTCGGG | GGCGGCATCAGTGTA ACTCC | Arabidopsis Salt Overly Sensitive pathway gene 3 |
| <i>AtGLS1</i>                           | AT5G04140 | CTTCTGCATGGGCGACGATA  | CCTAAGGGGGTCAATGGCAG  | Arabidopsis Glutamate Synthase 1                 |
| <i>AtGLS2</i>                           | AT2G41220 | GCAGCATTTAGCCAACCGTC  | AGGCTCAACCTTCCCAACAG  | Arabidopsis Glutamate Synthase 2                 |
| <i>OsACT2</i>                           | AT3G18780 | AGGTTCTGTTCCAGCCATC   | TTAGAAGCATTCCTGTGAAC  | Arabidopsis Actin coding gene 2                  |
